# Supplementary material for: TYRO3 promotes tumorigenesis and drug resistance in colorectal cancer by enhancing the epithelial-mesenchymal transition process
Source: publisher site journal article supplement (doi:10.18632/aging.204656), 2023-04-14
Supplement: Supplementary file [file aging-v15i8-204656-supplementary-material-SD1.pdf]

## SUPPLEMENTARY FIGURE

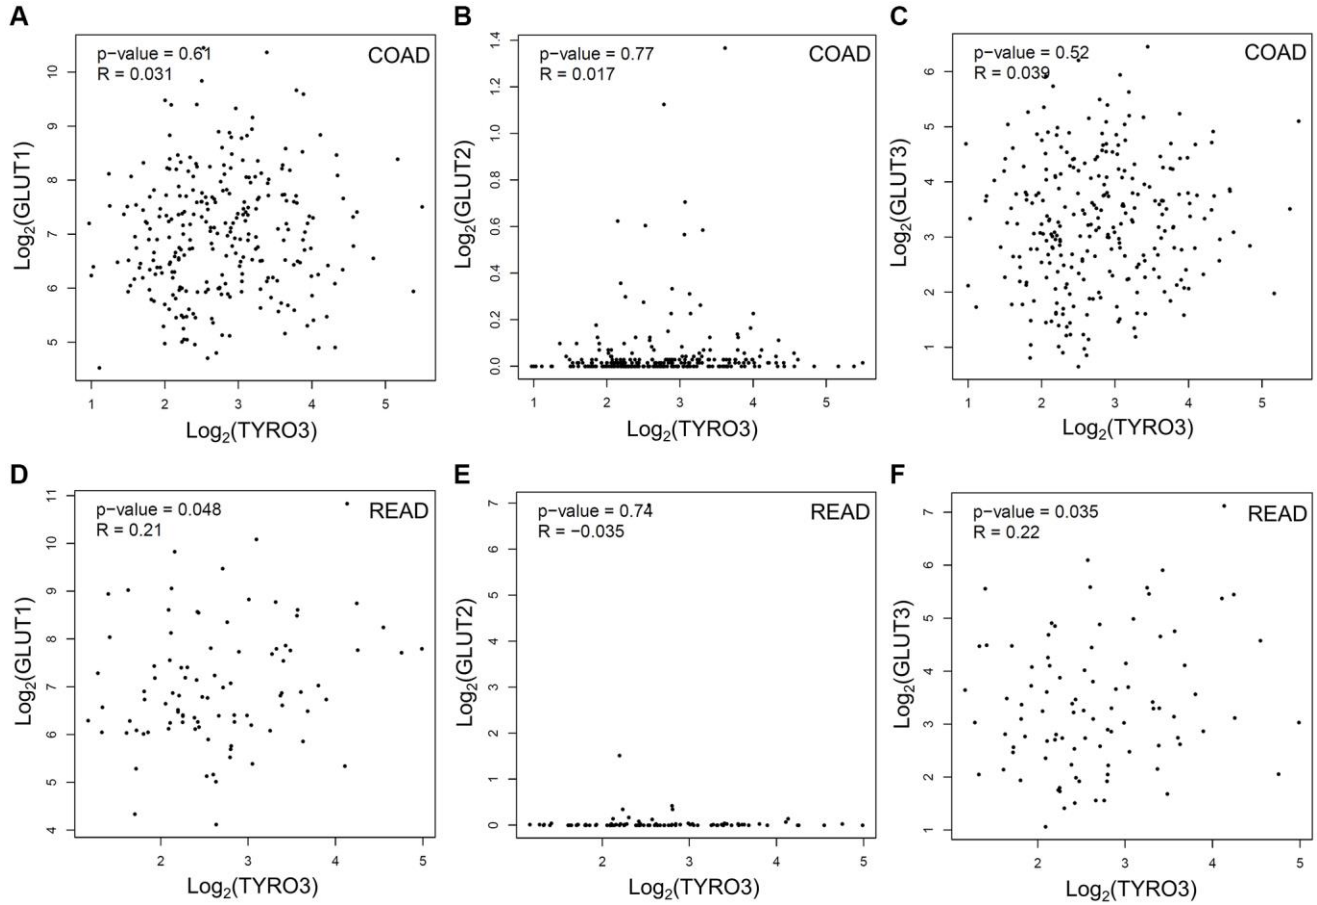

**Supplementary Figure 1. Correlation between TYRO3 and GLUT expression in colorectal cancer tissues in TCGA database.** (A–C) Correlation analysis of TYRO3 and (A) GLUT1, (B) GLUT2, (C) GLUT3 gene expression levels in colon cancer patients in TCGA datasets via GEPIA platform. (D–F) Correlation analysis of TYRO3 and (D) GLUT1, (E) GLUT2, (F) GLUT3 gene expression levels in rectal cancer patients in TCGA datasets via GEPIA platform. Abbreviations: COAD: colon cancer; READ: rectal cancer.
